# Supplementary material for: Ni2P2O7 microsheets as efficient Bi-functional electrocatalysts for water splitting application
Source: Royal Society of Chemistry journal article supplement (doi:10.1039/c9se00265k), 2019-01-01
Supplement: c9se00265k1.pdf [file c9se00265k1.pdf]

## **Ni<sub>2</sub>P<sub>2</sub>O<sub>7</sub> Microsheets as an efficient Bi-functional Electrocatalysts for Water Splitting Application**

**Subramani Surendran,<sup>abc</sup> Arumugam Sivanantham,<sup>b</sup> Sangaraju Shanmugam,<sup>\*b</sup> Uk Sim<sup>\*c</sup> and Ramakrishnan Kalai Selvan<sup>\*a</sup>**

*<sup>a</sup>. Energy Storage and Conversion Devices Laboratory, Department of Physics, Bharathiar University, Coimbatore-641046, Tamil Nadu, India. E-mail: selvankram@buc.edu.in; Fax: +91 4222425706; Tel: +91 422 2428446.*

*<sup>b</sup>. Department of Energy Science & Engineering, Daegu Gyeongbuk Institute of Science & Technology (DGIST), Daegu 42988, Republic of Korea. E-mail address: sangarajus@dgist.ac.kr (S. Shanmugam).*

*<sup>c</sup>. Department of Material Science and Engineering, Chonnam National University, Gwangju 61186, South Korea. E-mail address: usim@jnu.ac.kr (Uk Sim).*

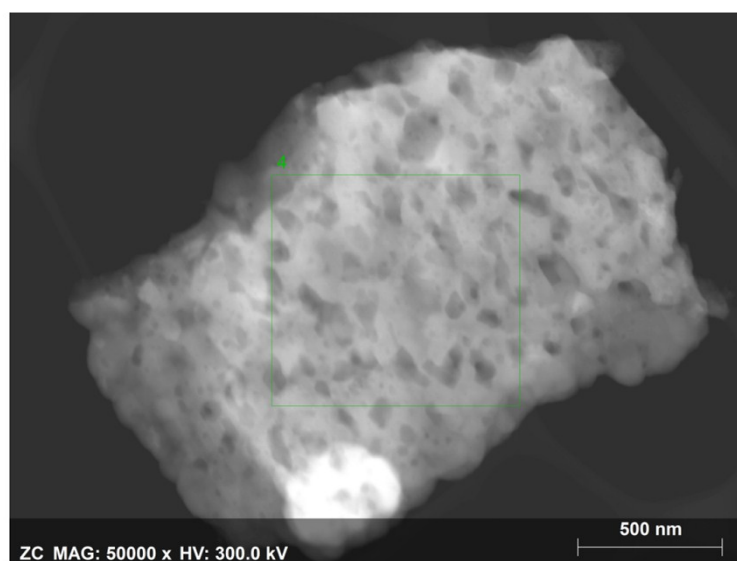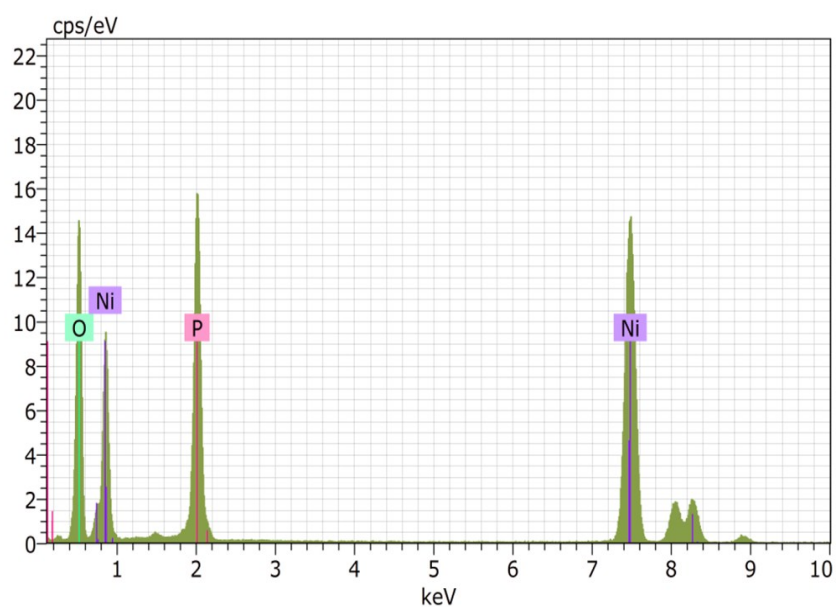

Spectrum: 2.xls

| El     | AN | Series   | Net unkn. | C norm. | C Atom. | Error (3 Sigma) |
|--------|----|----------|-----------|---------|---------|-----------------|
|        |    |          | [wt.%]    | [wt.%]  | [at.%]  | [wt.%]          |
| O      | 8  | K-series | 32683     | 29.04   | 29.04   | 53.96           |
| Ni     | 28 | K-series | 79323     | 48.67   | 48.67   | 24.65           |
| P      | 15 | K-series | 48380     | 22.29   | 22.29   | 21.39           |
| Total: |    |          | 100.00    | 100.00  | 100.00  |                 |

**Fig. S1** EDS spectrum of  $\text{Ni}_2\text{P}_2\text{O}_7$ .

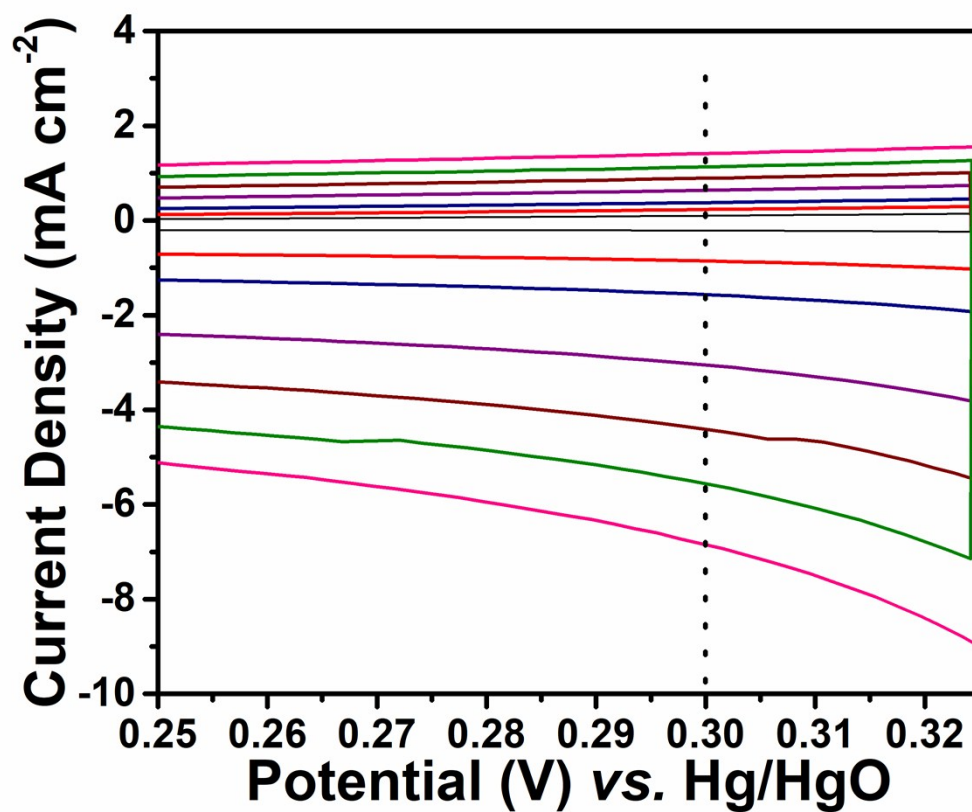

**Fig. S2** CV curves of  $\text{Ni}_2\text{P}_2\text{O}_7$  electrode at different scan rates on a potential range of 0.250 to 0.325 V vs. Hg/HgO.

**Table S1.** The Z-fit values of the equivalent circuit.

| Sample                            | R1<br>(Ohm) | C2<br>F | R2<br>(Ohm) | C3<br>F | R3<br>(Ohm) | W<br>(Ohm.s <sup>-1/2</sup> ) |
|-----------------------------------|-------------|---------|-------------|---------|-------------|-------------------------------|
| $\text{Ni}_2\text{P}_2\text{O}_7$ | 0.826       | 0.254   | 2.639       | 0.196   | 143.8       | 0.160                         |
